# Supplementary material for: Most Common Long COVID Physical Symptoms in Working Age Adults Who Experienced Mild COVID-19 Infection: A Scoping Review
Source: MDPI journal article supplement (doi:10.3390/healthcare10122577), 2022-12-19
Supplement: s1 [file s1]

## **Supplementary Table 1:**

All relevant data including the author, year, and country, aims of the study, methods and research design, sample size, and the most common long COVID physical symptoms.

| <b>Author, Country, Year</b>     | <b>Aim(s) of the study</b>                                                                                                                                                                                                   | <b>Study Design</b>                 | <b>Data Collection protocol/ collection tool</b> | <b>Timeline of Data collection</b> | <b>Sample Size</b> | <b>Most common Symptoms</b>                                                                                                  | <b>Days post infection</b> | <b>Average age</b>                                | <b>% of Women</b> | <b>Average BMI</b> | <b>Smokers</b> |
|----------------------------------|------------------------------------------------------------------------------------------------------------------------------------------------------------------------------------------------------------------------------|-------------------------------------|--------------------------------------------------|------------------------------------|--------------------|------------------------------------------------------------------------------------------------------------------------------|----------------------------|---------------------------------------------------|-------------------|--------------------|----------------|
| 1.Aly, et al, Egypt 2021         | To investigate post-COVID-19 symptoms amongst elderly females and whether they could be a risk factor for developing chronic fatigue syndrome                                                                                | Retrospective cross-sectional study | Online survey                                    | September till mid-October 2020    | 115                | Fatigue<br>Dyspnoea,<br>Cough, chest pain, myalgia, arthralgia weakness<br>Headache and dizziness                            | up 120 days                | 73 mean                                           | 100               | Not reported (NR)  | 47.8           |
| 2.Augustin, et al, Germany, 2021 | To explore the incidence, diagnostic criteria, and management of long-term health consequences at 4 and 7 months after mild courses of COVID-19                                                                              | Prospective and longitudinal study  | Questionnaire                                    | April 2020-January 2021            | 442                | Fatigue,<br>Dyspnoea, anosmia, muscle and joint pain, cough                                                                  | median 204 days            | Median age at the first visit was 43 years (3154) | 53.50%            | NR                 | NR             |
| 3.Bakilan, et al Turkey, 2021    | To evaluate the most frequent admission symptoms and the frequency of musculoskeletal symptoms in post-acute COVID-19 patients; and- to determine the related factors with the post-acute COVID-19 musculoskeletal symptoms. | Cross-sectional study               | EHR                                              | December 2020 and May 2021         | 240                | Fatigue Spine pain, Neck pain, Back pain, Low back pain, Spine pain, Muscle pain, Arthralgia joint pain, Numbness, dyspnoea, | NR                         | 47 Median (39-58)                                 | 66.60%            | 27.55              | 16.60%         |

| Author, Country, Year         | Aim(s) of the study                                                                                                                                                                                 | Study Design                       | Data Collection protocol/ collection tool                   | Timeline of Data collection                  | Sample Size | Most common Symptoms                                                                               | Days post infection | Average age                             | % of Women | Average BMI     | Smokers |
|-------------------------------|-----------------------------------------------------------------------------------------------------------------------------------------------------------------------------------------------------|------------------------------------|-------------------------------------------------------------|----------------------------------------------|-------------|----------------------------------------------------------------------------------------------------|---------------------|-----------------------------------------|------------|-----------------|---------|
|                               |                                                                                                                                                                                                     |                                    |                                                             |                                              |             | Cough, chest pain                                                                                  |                     |                                         |            |                 |         |
| 4.Barizien,etal, France, 2021 | To demonstrate this phenomenon by illustrating Heart rate variability dysregulation reflected through the NOL index showing the sympathetic/parasympathetic balance, in long COVID-19 participants. | Cross-sectional descriptive study  | NOL (nociception level) index measurements, PCL-5, NIJMEGEN | December 2020 to January 2021                | 27          | fatigue                                                                                            | 45 days             | 48 median                               | 47.10%     | 25.2            | NR      |
| 5.Bastola, et al, Nepal, 2021 | to study persistent symptoms in post-COVID-19 patients attending a follow-up clinic                                                                                                                 | Descriptive, cross-sectional study | standardized structured questionnaire                       | 1 March 2021 to 14 April 2021                | 118         | Shortness of breath, Fatigue, Chest heaviness, Cough, Chest pain, Anxiety, Palpitations, Headache  | 28 days             | 49.7 Mean +/- 15.01                     | 31.40%     | NA              | NR      |
| 6. Bierle, et al, USA, 2021   | To develop and implement criteria for description of post COVID syndrome                                                                                                                            | Prospective study                  | DELPHI methods by expert panel                              | November 15, 2019, to May 8 2020             | 42          | pain, fatigue, dyspnoea, and orthostatic intolerance                                               | 77 days             | 46.2 median 21-46                       | 66.60%     | NR              | NR      |
| 7. Bell et al, USA, 2021      | To investigate the impacts of the SARS-Cov-2 pandemic among Arizona residents who were non hospitalized                                                                                             | Prospective cohort study           | Online survey                                               | 30 days from 28 May 2020 to 24 February 2021 | 208         | Fatigue, shortness of-breath, Fatigue, Shortness of breath, Body aches or muscle pains, Headaches, | 60 days             | mean age of 44 years (range 12-82 years | 70%        | 28.5kg/m2 (7.3) | 27%     |

| Author, Country, Year           | Aim(s) of the study                                                                                                                                                            | Study Design                            | Data Collection protocol/ collection tool | Timeline of Data collection    | Sample Size | Most common Symptoms                                                                                                    | Days post infection | Average age         | % of Women | Average BMI             | Smokers                  |
|---------------------------------|--------------------------------------------------------------------------------------------------------------------------------------------------------------------------------|-----------------------------------------|-------------------------------------------|--------------------------------|-------------|-------------------------------------------------------------------------------------------------------------------------|---------------------|---------------------|------------|-------------------------|--------------------------|
|                                 |                                                                                                                                                                                |                                         |                                           |                                |             | Faster than normal heart rate (Tachycardia), Dizziness/light headedness, Chest pain or tightness, brain fog and anxiety |                     |                     |            |                         |                          |
| 8. Bliddal et al, Denmark, 2021 | To determine the prevalence of and risk factors for acute and persistent symptoms in non-hospitalized patients                                                                 | Cohort/ case series (no comparison grp) | Questionnaire                             | June 24th and August 15th 2020 | 129         | Fatigue, Dyspnoea, Cough, chest pain, Headache, myalgia or arthralgia                                                   | 84 days             | 47.4 mean SD 15.2   | 76.4%      | 26.8                    | 16.7% (ever)             |
| 9. Blomberg et al, Norway, 2021 | To identify factors and biomarkers associated with long-term complications, 6 months after initial COVID-19 in a prospective cohort of hospitalized and home-isolated patients | Prospective cohort study                | Questionnaire/ blood samples              | 28 February to 4 April 2020    | 247         | Fatigue, Disturbed taste/smell, Concentration problems, Memory problems, Dyspnoea, Headache, Dizziness                  | 60 days/ 180 days   | Median 43 (27–55)   | 53%        | Median 24.3 (22.5–26.5) | NR                       |
| 10. Boesl et al, Germany, 2021  | To report on the clinical presentation of the first 100 patients who presented to our PCS Neurology outpatient clinic $\geq 12$ weeks after the                                | Descriptive study                       | ESS, BDI, FSS, MoCA                       | September 2020 and April 2021  | 100         | Fatigue, joint pain, myalgia, headache, vertigo                                                                         | 184.5 days          | 45.8 mean (20 – 79) | 67%        | NR                      | 24.2% moderate or severe |

| Author, Country, Year                   | Aim(s) of the study                                                                                                                                                                                                                                                                                                             | Study Design                        | Data Collection protocol/ collection tool                                                          | Timeline of Data collection        | Sample Size | Most common Symptoms                                                            | Days post infection          | Average age           | % of Women | Average BMI                 | Smokers |
|-----------------------------------------|---------------------------------------------------------------------------------------------------------------------------------------------------------------------------------------------------------------------------------------------------------------------------------------------------------------------------------|-------------------------------------|----------------------------------------------------------------------------------------------------|------------------------------------|-------------|---------------------------------------------------------------------------------|------------------------------|-----------------------|------------|-----------------------------|---------|
|                                         | acute infection with SARS-CoV-2.                                                                                                                                                                                                                                                                                                |                                     |                                                                                                    |                                    |             |                                                                                 |                              |                       |            |                             |         |
| 11. Buoite Stella, et al, Italy, 2021   | To assess the prevalence of ANS dysfunction, evaluated with the COMPASS-31 questionnaire and an active stand test, in a real-life setting in consecutive patients referred to the post-COVID ambulatory service, and to compare the patients who presented neurological symptoms with those without neurological manifestations | Prospective observational study,    | Clinical and instrumental evaluation by a neurologist, COMPASS-31 questionnaire, active stand test | February 15 to May 15 2021         | 180         | Exertional dyspnoea, Brain fog, Joint pain, Muscle pain and weakness, dizziness | Median 59 days (31-175 days) | 51 +/- 13             | 70.6%      | NR                          | NR      |
| 12. Danesh, et al, USA, 2021            | To describe the sequelae of COVID-19 in patients referred to COVID recovery clinic services. 2. Examine the similarities of COVID-19 sequelae in the context of initial onset and severity of acute illness in patients seeking COVID recovery care                                                                             | Cross sectional Observational Study | semi structured interview, EHR                                                                     | November 2020– February 2021       | 63          | Fatigue, dyspnoea, cough, myalgia and arthralgia, headache, unable to work      | median 82 day                | 52                    | 71%        | 32% comorbidity was obesity | NR      |
| 13. Davin-Casalena, et al, France, 2021 | To identify the proportion of French GPs with patients with potential long COVID syndrome and the symptoms they reported                                                                                                                                                                                                        | cross-sectional                     | Online questionnaire                                                                               | October 6 and November 15, 2020, w | 651         | Respiratory problems, Headache, Chest pains, sleep disorders                    | 60 – 90 days                 | NR                    | 40.30%     | NR                          | NR      |
| 14. Davis, et al, USA, UK, 2021         | To better describe the patient experience and recovery process in those with                                                                                                                                                                                                                                                    | Prospective observational study     | Survey                                                                                             | September 6, 2020, to              | 3762        | fatigue 70.4%, breathing issues 59.5%                                           | 180 days                     | 30 – 60 33.7% between | 78.80%     | NR                          | NR      |

| Author, Country, Year        | Aim(s) of the study                                                                                                                                                                                                                                                                      | Study Design                           | Data Collection protocol/ collection tool  | Timeline of Data collection                   | Sample Size | Most common Symptoms                                                                                     | Days post infection                                                      | Average age                | % of Women | Average BMI         | Smokers |
|------------------------------|------------------------------------------------------------------------------------------------------------------------------------------------------------------------------------------------------------------------------------------------------------------------------------------|----------------------------------------|--------------------------------------------|-----------------------------------------------|-------------|----------------------------------------------------------------------------------------------------------|--------------------------------------------------------------------------|----------------------------|------------|---------------------|---------|
|                              | confirmed or suspected COVID-19 illness, with a specific emphasis on the Long COVID                                                                                                                                                                                                      |                                        |                                            | November 25, 2020.                            |             |                                                                                                          |                                                                          | n ages 40-49 biggest group |            |                     |         |
| 15. Dennis, et al, UK, 2021  | investigate (1) the prevalence of multiorgan impairment, compared with healthy, age-matched controls; (2) the associations between typical COVID-19 symptoms and multiorgan impairment; and (3) the associations between hospitalisation, severity of symptoms and multiorgan impairment | Prospective observational cohort study | Questionnaires, Dyspnoea-12, EQ-5D-5L, MRI | 1 April 2020 and 14 September 2020,           | 163         | Fatigue, Shortness of breath, muscle ache, Headache, Joint pain, Chest pain, cough, Fever, sore throat   | median of 141 days after initial symptoms (range between 110 - 162 days) | 43 +/- 10.9                | 72.4%      | 25.3% (22.7 - 27.7) | 30%     |
| 16. Estiri, et al, USA, 2021 | To identify accurate identification of Post-acute Covid sequelae phenotypes in age/ gender groups at two windows of time                                                                                                                                                                 | Retrospective Cohort Study             | EHR and clinical expertise,                | March 2020 and June 2021                      | 96025       | Fatigue, insomnia, dysgeusia, shortness of breath, chronic fatigue syndrome, and non-specific chest pain | 90 – 180 days/ 180 – 270 days                                            | 44                         | 71%        | median BMI was 25.7 | 3%      |
| 17. Gaber, et al, UK, 2021   | To investigate of long-term impact of COVID-19 in Health caseworkers                                                                                                                                                                                                                     | Prospective Observational Study        | Survey monkey questionnaire                | July 1 <sup>st</sup> - August 1 <sup>st</sup> | 61          | fatigue, SOB, sleep disturbances, mood disturbances                                                      | 90 – 120 days                                                            | NR                         | 45%        | NR                  | NR      |

| Author, Country, Year                         | Aim(s) of the study                                                                                                                                           | Study Design                                                           | Data Collection protocol/ collection tool             | Timeline of Data collection                                          | Sample Size | Most common Symptoms                                                                                                                                                                                       | Days post infection | Average age | % of Women | Average BMI           | Smokers |
|-----------------------------------------------|---------------------------------------------------------------------------------------------------------------------------------------------------------------|------------------------------------------------------------------------|-------------------------------------------------------|----------------------------------------------------------------------|-------------|------------------------------------------------------------------------------------------------------------------------------------------------------------------------------------------------------------|---------------------|-------------|------------|-----------------------|---------|
| 18. Ganesh, et al, USA, 2021                  | To add insight into our understanding of certain post-acute conditions and clinical findings.                                                                 | Retrospective cross-sectional Study                                    | EMR, PROMIS questionnaire                             | March 1 <sup>st</sup> , 2020, and September 12 <sup>th</sup> , 2020. | 817         | Fatigue 16.2%, pain 17.8%, physical function 10.6%, social roles 43.2%, sleep 9.9% disturbance of function                                                                                                 | 68.4 days           | 44 mean     | 61.10%     | NR                    | NR      |
| 19. Gonzalez-Andrade, F. Et al, Ecuador, 2021 | To identify and compare post-COVID symptoms between 3 groups of outpatients who had experienced mild, moderate, and severe infection and look at risk factors | Retrospective epidemiological + Cross sectional (Symptoms past 7 days) | demographic data, CFQ-11, subjective perception scale | January and April 2021                                               | 566         | Fatigue, dyspnoea, cough, sputum, chest tightness, chest pain, Palpitations, head ache, sleep disorders, dizziness, Myalgia, Arthralgia, Reduced mobility (inability to move fully or to control movement) | >28 days            | 39          | 49.71%     | NR                    | NR      |
| 20. Goertz, et al, Netherlands, 2020          | To assess whether symptoms recover following the onset of COVID-19                                                                                            | Prospective observational Study                                        | online survey                                         | 4–11 June 2020                                                       | 2113        | Fatigue, headache, chest tightness, muscle pain, dizziness, joint pain Dizziness, heart                                                                                                                    | 79 days after       | age 43      | 91%        | 26 median (23.3–29.4) | NR      |

| Author, Country, Year               | Aim(s) of the study                                                                                                                                                                                   | Study Design              | Data Collection protocol/ collection tool | Timeline of Data collection | Sample Size | Most common Symptoms                                                                                                                                                 | Days post infection | Average age               | % of Women | Average BMI             | Smokers |
|-------------------------------------|-------------------------------------------------------------------------------------------------------------------------------------------------------------------------------------------------------|---------------------------|-------------------------------------------|-----------------------------|-------------|----------------------------------------------------------------------------------------------------------------------------------------------------------------------|---------------------|---------------------------|------------|-------------------------|---------|
|                                     |                                                                                                                                                                                                       |                           |                                           |                             |             | palpitations, increased resting heart rate                                                                                                                           |                     |                           |            |                         |         |
| 21. Graham, et al, USA, 2021        | To characterize the spectrum of neurologic manifestations in non-hospitalized Covid-19 “long haulers”                                                                                                 | Prospective observational | Medical records, PROMIS, NIH Toolbox      | February 2020 or later,     | 100         | Fatigue, “brain fog”, headache, numbness/tingling, Myalgia, Dizziness, Pain other than chest, Depression/Anxiety, SOB, Chest pain, Insomnia, variations in HR and BP | mean 30 days        | 47 median (37-53.5)       | 70%        | 25.4                    | NR      |
| 22. Heightman, et al, UK, 2021      | To report the baseline characteristics, clinical presentation, management, and outcomes of PACS over a 12-month period                                                                                | Observational analysis    | Post-COVID-19 assessment                  | April 2020 and April 2021,  | 566         | Breathlessness, fatigue, cough, muscle ache, chest pain, Myalgia, Headache                                                                                           | mean 194 days       | 44.6 median (35.6 – 52.8) | 68.20%     | NR                      | NR      |
| 23. Herck, et al, Netherlands, 2021 | To assess the severity of fatigue over time in members of online long COVID peer support groups, and to assess whether members of these groups experienced mental fatigue, physical fatigue, or both. | Prospective study         | Online survey                             | June 4 and June 11, 2020 (  | 239         | Fatigue                                                                                                                                                              | 90 and 180 days     | 50                        | 82.80%     | 26 median (23.4 – 30.5) | NR      |

| Author, Country, Year                | Aim(s) of the study                                                                                                                                                      | Study Design                      | Data Collection protocol/ collection tool                   | Timeline of Data collection | Sample Size | Most common Symptoms                                                                                                                    | Days post infection           | Average age   | % of Women | Average BMI | Smokers                           |
|--------------------------------------|--------------------------------------------------------------------------------------------------------------------------------------------------------------------------|-----------------------------------|-------------------------------------------------------------|-----------------------------|-------------|-----------------------------------------------------------------------------------------------------------------------------------------|-------------------------------|---------------|------------|-------------|-----------------------------------|
| 24. Holmes, et al, Australia, 2021   | To develop the basis of an objective metabolic framework for measuring systemic recovery in COVID-19 patients using a range of metabolic technologies and biomarkers     | Prospective cohort study          | survey                                                      |                             | 27          | At 3 months: Fatigue, cough, (myalgia) muscle ache, Join pain, chest pain. At 6 months: Fatigue, cough, myalgia, Join pain, chest pain. | 90 and 180 days               | NR            | NR         | NR          | NR                                |
| 25. Hossain, et al, Bangladesh, 2021 | To identify the prevalence of long COVID symptoms in a large cohort of people living with and affected by long COVID and identify any potential associated risk factors. | Prospective observational study   | Survey                                                      | June and November 2020      | 356         | Fatigue, cough, myalgia, chest pain                                                                                                     | 30 – 120 days/ 120 – 217 days | 38.7 +/- 11   | 32%        | NR          | NR                                |
| 26. Jacobson et al, USA, 2021        | To assess the prevalence of persistent functional impairment after coronavirus disease (COVID-19)                                                                        | Retrospective study               | physical exam, survey of symptoms, WPAI, 6-minute walk test | November to December 2020   | 49          | Fatigue, breathlessness, cough, myalgia, chest pain                                                                                     | 90 – 120 days-                | 41.6 SD =12.5 | 49%        | 30 +/-6.1   | NR                                |
| 27. Kamal, et al, Egypt, 2021        | To investigate and characterize the manifestations which appear after eradication of the coronavirus infection and its relation to disease severity                      | Cross sectional observation study | Questionnaire                                               | April and June, 2020        | 287         | fatigue, anxiety, joints pain, continuous headache, chest pain, dementia,                                                               | NR                            | 32.3 +/-8.5   | 64.10%     | 28.5 +/-5.2 | 27.2% males were smokers no women |



| Author, Country, Year                 | Aim(s) of the study                                                                                                             | Study Design                    | Data Collection protocol/ collection tool               | Timeline of Data collection          | Sample Size | Most common Symptoms                                                          | Days post infection  | Average age         | % of Women | Average BMI               | Smokers |
|---------------------------------------|---------------------------------------------------------------------------------------------------------------------------------|---------------------------------|---------------------------------------------------------|--------------------------------------|-------------|-------------------------------------------------------------------------------|----------------------|---------------------|------------|---------------------------|---------|
|                                       |                                                                                                                                 |                                 |                                                         |                                      |             | depression, and dyspnea                                                       |                      |                     |            |                           |         |
| 28. Kashif, et al, Pakistan, 2021     | To identify the presence of post-viral symptomatology in patients recovered from mild COVID-19 disease.                         | Prospective Observational Study | a telephonic follow-up with open-ended questions        |                                      | 242         | Fatigue, Myalgia, Sleep disturbances, Chest pain , Cough                      | 90 days              | 33.65 +/- 11.2      | 30.60%     | NR                        | NR      |
| 29. Kayaaslan et al, Turkey, 2021     | To inquire about the presence of persistent symptoms beyond 12 weeks from the first diagnosis                                   | Prospective Observational study | Questionnaire                                           | August 1, 2020, and October 31, 2020 | 478         | Fatigue, Myalgia, dyspnoea, Chest pain, Cough, palpitations                   | median time 140 days | 50 median (18 – 87) | 48.10%     | 28                        | NR      |
| 30. Lund, et al, Denmark, 2021        | To examine the occurrence of post-acute effects 2 weeks to 6 months after SARS-CoV-2 infection not requiring hospital admission | Retrospective cohort study      | Clinical health records                                 | Feb 27 and May 31, 2020              | 8983        | Venous thromboembolism, dyspnoea needing bronchodilators                      | 14 days – 180 days   | 43 median (30 – 56) | 60.90%     | NR                        | NR      |
| 31. Machado et al, Netherlands , 2021 | To assess the construct validity of the PCFS Scale among adult subjects with confirmed and presumed COVID-19                    | cross-sectional study           | Survey, Questionnaire, PCFS Scale, EQ-5D-5L, VAS, WPAI, | June 4th and June 11th, 2020.        | 1939        | Fatigue, muscle weakness and sleeping problems were the most intense symptoms | mean 79 days         | 46 +/-11            | 85%        | 25.2 median (22.6 – 28.8) | 6%      |
| 32. Mady et al, Egypt, 2021           | To evaluate symptoms that persist after the acute stage of the disease in a cohort of patients with confirmed or                | Retrospective study             | EHR                                                     | N/A                                  | 143         | Fatigue, Myalgia, dyspnoea, Cough                                             | > 90 days            | 50 median (17 – 82) | 45.10%     | NR                        | 28.7%   |

| Author, Country, Year                  | Aim(s) of the study                                                                                                                                   | Study Design                        | Data Collection protocol/ collection tool        | Timeline of Data collection     | Sample Size | Most common Symptoms                                                                                                       | Days post infection | Average age         | % of Women | Average BMI  | Smokers |
|----------------------------------------|-------------------------------------------------------------------------------------------------------------------------------------------------------|-------------------------------------|--------------------------------------------------|---------------------------------|-------------|----------------------------------------------------------------------------------------------------------------------------|---------------------|---------------------|------------|--------------|---------|
|                                        | suspected COVID 19 and to define the predictors for long COVID syndrome.                                                                              |                                     |                                                  |                                 |             |                                                                                                                            |                     |                     |            |              |         |
| 33. Mahmoud, et al, Saudi Arabia, 2021 | To identify manifestations and predisposing factors for post-COVID-19 syndrome in Saudi Arabia.                                                       | Cross sectional observational study | Survey, questionnaire                            | May 2021 through June 2021      | 75          | Dyspnoea, Fatigue, malaise, headache, mental and psychological problems                                                    | > 30 days           | 32.8 +/-5.2         | 57.30%     | 25.9 +/-3.21 | 75.30%  |
| 34. Matta, et al, France, 2021         | To examine the associations of self-reported COVID-19 infection and SARS-CoV-2 serology test results in people with with persistent physical symptoms | Cross-sectional analysis            | SAPRIS survey                                    | December 2020 and January 2021, | 25271       | Sleep problems, joint pain, Back pain, muscle pain, fatigue, headache, breathing difficulty, chest pain, cough , dizziness | varied              | 49.9 +/-12.9        | 58.20%     | NR           | NR      |
| 35. Mittal, et al, India, 2021         | To assess the prevalence and severity of Post COVID19 Symptoms and the treatment required and to make recommendation for Post COVID-19 care           | cross sectional study               | Medical notes, google forms self-documented from | NA                              | 100         | Weakness, Body ache Neuro-psychiatric symptoms restlessness and Giddiness, Respiratory symptoms, Headache, Palpitation,    | 42 – 84 days        | 57% 20-40 age group | 40%        | NR           | NR      |

| Author, Country, Year                   | Aim(s) of the study                                                                                         | Study Design                    | Data Collection protocol/ collection tool                       | Timeline of Data collection    | Sample Size | Most common Symptoms                                    | Days post infection | Average age               | % of Women | Average BMI  | Smokers |
|-----------------------------------------|-------------------------------------------------------------------------------------------------------------|---------------------------------|-----------------------------------------------------------------|--------------------------------|-------------|---------------------------------------------------------|---------------------|---------------------------|------------|--------------|---------|
|                                         |                                                                                                             |                                 |                                                                 |                                |             | Chest pain, High B.P.                                   |                     |                           |            |              |         |
| 36. Mohamed-Hussein, et al, Egypt, 2021 | To assess long COVID-19 symptoms in hospitalised and non-hospitalised patients.                             | cross-sectional                 | Medical notes, online form, or interviews                       | 1 July to 9 October 2020       | 167         | Constitutional (fatigue), Respiratory, Neuropsychiatric | <84 days            | 38.7 +/-13.1              | 58.70%     | 27.2 +/- 7.8 | 16.20%  |
| 37. Munker, et al, Germany, 2021        | To investigate and evaluate pulmonary function impairment after COVID-19 disease                            | Prospective Observational study | Pulmonary function impairment (PFI), DLCOcSB, TLC, FVC, or FEV1 | March to August 2020           | 35          | respiratory symptoms                                    | 120 days            | 43.3 +/- 17.4             | 62.90%     | NR           | 14.30%  |
| 38. Naik, et al, India, 2021            | To describe the clinical features and risk factors of post COVID-19 sequelae in the North Indian population | Prospective observational study | Interviews                                                      | October 2020 and February 2021 | 523         | myalgia, fatigue, shortness of breath, dry cough        | median 91 days      | 38.1                      | 29.80%     | NR           | NR      |
| 39. Nehme, et al, Switzerland, 2021     | To characterize symptoms 7 to 9 months after diagnosis of COVID-19                                          | Prospective observational study | Self-reported surveys and semi structured telephone interviews  | 18 March and 15 May 2020       | 410         | Fatigue, dyspnoea, Cough , Myalgia , chest pains        | 120 – 210 days      | 42.7                      | 67.10%     | NR           | NR      |
| 40.Nielsen, K. J. et al, Denmark, 2021  | To compare symptoms day by day for non-hospitalized individuals testing positive and negative SARS-CoV-2.   | Prospective observational study | Questionnaire                                                   | March 11 and June 30, 2020     | 215         | Dyspnoea, Cough, headache, sore throat, muscle pain,    | 90 days             | 30.5% between ages 40 -49 | 84.3%      | NR           | NR      |

| Author, Country, Year                     | Aim(s) of the study                                                                                                                                              | Study Design                    | Data Collection protocol/ collection tool      | Timeline of Data collection       | Sample Size | Most common Symptoms                                                                                                                                                                                                                         | Days post infection | Average age                   | % of Women | Average BMI | Smokers |
|-------------------------------------------|------------------------------------------------------------------------------------------------------------------------------------------------------------------|---------------------------------|------------------------------------------------|-----------------------------------|-------------|----------------------------------------------------------------------------------------------------------------------------------------------------------------------------------------------------------------------------------------------|---------------------|-------------------------------|------------|-------------|---------|
| 41. Ordinola Navarro, et al, Mexico, 2021 | to evaluate the changes in quality-of-life (QOL) and spirometry alterations in the convalescent phase of 115 patients with at least 30 days post-COVID-19        | Prospective observational study | EQ-5D-5L, Questionnaire VAS and spirometry     | Apr 01 to Jul 30, 2020            | 115         | Fatigue, dyspnoea, Cough, chest pains, Back pain                                                                                                                                                                                             | Median 30 days      | 40                            | 49.50%     | 27.76       | 25.20%  |
| 42. Orrù, et al. Italy, 2021              | To evaluate the physical and psychological health conditions of a representative sample of the Italian population suffering from symptoms related to long COVID. | cross-sectional                 | On online survey and ISI, EQ-5D questionnaires | 5th February to 15 February 2021, | 507         | > 2 months reported the following symptoms: fatigue (79%), muscle aches/myalgia (53%), and headache (49%). > 3 months indicated that they suffered from these symptoms: fatigue (74%), muscle aches/myalgia (61%), and articular pains (59%) | 30/60/ 90 days      | 30% of people between 40 - 49 | 82.05      | NR          | NR      |
| 43. Peghin, et al, Italy, 2021            | To assess the prevalence of and factors associated with post-coronavirus disease 2019                                                                            | Bidirectional prospective       | interviews                                     | September and November 2020       | 599         | Fatigue, dyspnoea, Cough, joint pain, chest                                                                                                                                                                                                  | Median 191 days     | 45.2                          | 60.60%     | 14.9% obese | 11.20%  |

| Author, Country, Year                     | Aim(s) of the study                                                                                                           | Study Design                    | Data Collection protocol/ collection tool                                                                       | Timeline of Data collection                                 | Sample Size                           | Most common Symptoms                                                                                              | Days post infection | Average age | % of Women | Average BMI | Smokers |
|-------------------------------------------|-------------------------------------------------------------------------------------------------------------------------------|---------------------------------|-----------------------------------------------------------------------------------------------------------------|-------------------------------------------------------------|---------------------------------------|-------------------------------------------------------------------------------------------------------------------|---------------------|-------------|------------|-------------|---------|
|                                           | (COVID-19) syndrome 6 months after the onset                                                                                  | cohort study                    |                                                                                                                 |                                                             |                                       | pains, neurological symptoms                                                                                      |                     |             |            |             |         |
| 44. Petersen, et al, Faroe Island, 2021   | To describe symptoms in the acute phase and especially long COVID in mainly non-hospitalized patients from the Faroe Islands. | Longitudinal study              | Questionnaire, phone interviews. Self-reported physical performance loss, Likert QOL, and mental health and PHQ | 3 March and 22 April 2020                                   | 180                                   | Fatigue, dyspnoea , Cough , joint pain chest pains                                                                | Median 125 days     | 39.9        | 54%        | NR          | 19.30%  |
| 45. Sahanic, et al , Italy, Austria, 2021 | To explore recovery phenotypes in non-hospitalized COVID-19 individuals                                                       | Cross-sectional                 | online survey                                                                                                   | 30 <sup>th</sup> September 2020 – 5 <sup>th</sup> July 2021 | 4-12 weeks N= 990<br><12 weeks N= 432 | Fatigue, tired days, headaches, joint pain, dry cough, tachypnoea, chest pain , dyspnoea , bone pain, muscle pain | <90 days            | 44          | 66.70%     | 27.3        | NR      |
| 46. Shendy, et al, Egypt, 2021            | To determine the prevalence of fatigue in adult people post mild and moderate covid-19 case                                   | Prospective observational study | Telephone questionnaire MFIS, Shortened FIM                                                                     | 15 September 2020 - 15st December 2020                      | 81                                    | Fatigue                                                                                                           | 90 – 150 days       | 34          | 68%        | 29.6        | NR      |
| 47. Shouman et                            | To identify the clinical features that overlap with symptoms of autonomic/small fibre                                         | Retrospective cross-            | medical record review,                                                                                          | March 2020 and                                              | 27                                    | POTS Light-headedness, orthostatic                                                                                | < 45 days           | 30          | 59%        | NR          | NR      |

| Author, Country, Year           | Aim(s) of the study                                                                                                                                                                                                                                              | Study Design               | Data Collection protocol/ collection tool        | Timeline of Data collection | Sample Size | Most common Symptoms                                                                                                                               | Days post infection | Average age | % of Women | Average BMI | Smokers |
|---------------------------------|------------------------------------------------------------------------------------------------------------------------------------------------------------------------------------------------------------------------------------------------------------------|----------------------------|--------------------------------------------------|-----------------------------|-------------|----------------------------------------------------------------------------------------------------------------------------------------------------|---------------------|-------------|------------|-------------|---------|
| al, Germany, 2021               | dysfunction and post covid syndrome                                                                                                                                                                                                                              | sectional study            | Autonomic function testing                       | January 2021                |             | headache, syncope, hyperhidrosis, and burning pain. Sudomotor function was abnormal, cardiovagal function, and cardiovascular adrenergic function. |                     |             |            |             |         |
| 48. Sivan, et al, UK, 2021      | To explore the presence of symptoms severity phenotypes in a community PCS cohort, including a large proportion of non-hospitalized participants, and understand the relationship between severity of symptoms, functional disability, and overall health in PCS | Cross sectional evaluation | C19-YRS                                          | February 2 and May 3, 2021  | 370         | Fatigue, anxiety, some pain or discomfort, breathlessness, some cognitive difficulties                                                             | median 211 day      | 47          | 64%        | 29          | 45%     |
| 49. Skala, et al, Czechia, 2021 | To stratify post-COVID patients into four newly established clinical groups based on the presence or absence of at least one subjective respiratory symptom and at least one objective sign of pulmonary involvement                                             | prospective study          | Hospital records and clinical expert interviewer | June and October 2020 a     | 102         | Fatigue, dyspnoea, cough, pain/chest discomfort, joint and muscle pain                                                                             | 90 days             | 46.7        | 54%        | NR          | NR      |

| Author, Country, Year                     | Aim(s) of the study                                                                                    | Study Design                             | Data Collection protocol/ collection tool                                  | Timeline of Data collection       | Sample Size | Most common Symptoms                                                                                      | Days post infection | Average age      | % of Women | Average BMI      | Smokers |
|-------------------------------------------|--------------------------------------------------------------------------------------------------------|------------------------------------------|----------------------------------------------------------------------------|-----------------------------------|-------------|-----------------------------------------------------------------------------------------------------------|---------------------|------------------|------------|------------------|---------|
| 50. Soraas, et al, Norway, 2021           | To investigate the self reported health compared to one year ago three to eight months after COVID-19. | Prospective cohort study                 | Online survey, RAND-36                                                     | February 1 and April 15, 2020     | 794         | Fatigue, dyspnoea, cough, joint and muscle pain                                                           | 90 days             | 26% ages 50 - 59 | 55%        | NA               | 38%     |
| 51. Sudre, et al, UK, US and Sweden, 2021 | To identify individuals at risk of long COVID                                                          | Prospective observational cohort study   | Reporting on COVID Symptom Study app.                                      |                                   | 4182        | fatigue, headache, dyspnoea, asomnia                                                                      | Median 41 day       | 52               | 83.10%     | 26.5             | NR      |
| 52. Sultana, et al, Bangladesh            | To estimate the prevalence, length of illness, and risk factors of post-COVID symptoms                 | Descriptive cross-sectional analysis     | A semi-structured questionnaire , telephone interviews, self-reported data | April 1, 2020, to July 30, 2020   | 186         | fatigue, breathing difficulties, cough, palpitations, chest pain, sleep disorders, muscle pain, headaches | 30-60/ >61          | 34.8             | 33.90%     | NR               | 13.40%  |
| 53. Tabacof, et al, USA 2022              | To describe the persistent symptoms reported by a cohort of patients with PACS                         | Retrospective observational study        | Surveys containing patient-reported outcomes                               | March 2020 and March 2021         | 156         | Fatigue, dyspnoea, palpitations, muscle pain chest pains                                                  | 90 days             | 44               | 69%        | 24               | NR      |
| 54. Taquet, et al, UK, 2021               | To describe the incidence, co-occurrence, and evolution of long-COVID features                         | Retrospective observational cohort study | EHR                                                                        | December 2019 - December 16, 2020 | 106,578     | Dyspnoea, fatigue/malaise , chest/throat pains, headache, other pain, myalgia                             | 90 -180 days        | 39.4             | 58.40%     | 17.9% overweight | NR      |

| Author, Country, Year               | Aim(s) of the study                                                                                                                                                                                                                                                                                                                                  | Study Design                         | Data Collection protocol/ collection tool                                                                       | Timeline of Data collection    | Sample Size | Most common Symptoms                                                       | Days post infection  | Average age | % of Women | Average BMI | Smokers |
|-------------------------------------|------------------------------------------------------------------------------------------------------------------------------------------------------------------------------------------------------------------------------------------------------------------------------------------------------------------------------------------------------|--------------------------------------|-----------------------------------------------------------------------------------------------------------------|--------------------------------|-------------|----------------------------------------------------------------------------|----------------------|-------------|------------|-------------|---------|
| 55. Townsend, et al, Ireland, 2020  | To establish whether patients recovering from SARS-CoV-2 infection remained fatigued after their physical recovery, and to investigate whether there was a relationship between severe fatigue and a variety of clinicopathological parameters. We also sought to examine persistence of markers of disease beyond clinical resolution of infection. | Descriptive cross-sectional analysis | CFQ-11, EHR                                                                                                     | NR                             | 128         | Physiological fatigue, physical fatigue                                    | NR                   | 49.5        | 43.90%     | 28.7        | 7.80%   |
| 56. Tran, et al, France, 2021       | To develop and validate patient-reported instruments, based on patients' lived experiences, for monitoring the symptoms and impact of long coronavirus disease (COVID)                                                                                                                                                                               | retrospective cohort study           | Online survey with open ended questions with multiple-round qualitative content analysis to examine the content | 14 October to 29 November 2020 | 1102        | Fatigue, headaches, sleep disorders, and dyspnoea                          | Median time 217 days | 45          | 84%        | NR          | NR      |
| 57. Vanichkachorn, et al, USA, 2021 | To describe characteristics of a series of patients reporting prolonged symptoms after an infection with coronavirus disease 2019 (COVID-19)                                                                                                                                                                                                         | A prospective observational study    | medical record review and focused interview patient-reported history.                                           |                                | 100         | Fatigue, Dyspnoea, Cough, Headache Dizziness, Paraesthesia, Limits to ADLs | 79.3 days            | 45.4        | 68%        | 30.2        | NR      |



| Author, Country, Year      | Aim(s) of the study                                                                                                                                                  | Study Design          | Data Collection protocol/ collection tool | Timeline of Data collection         | Sample Size | Most common Symptoms                                                                                                                                                                                                                                                                                                                        | Days post infection           | Average age        | % of Women | Average BMI | Smokers |
|----------------------------|----------------------------------------------------------------------------------------------------------------------------------------------------------------------|-----------------------|-------------------------------------------|-------------------------------------|-------------|---------------------------------------------------------------------------------------------------------------------------------------------------------------------------------------------------------------------------------------------------------------------------------------------------------------------------------------------|-------------------------------|--------------------|------------|-------------|---------|
| 58. Wang, et al, USA, 2021 | To develop a comprehensive post-acute sequelae of COVID-19 (PASC) symptom lexicon (PASCLeX) from clinical notes to support PASC symptom identification and research. | Longitudinal Study    | EHR                                       | March 4, 2020 and February 09, 2021 | 26,117      | Pain, Insomnia, Anxiety, Pain in extremities, Depression, Paraesthesia, Fatigue, Peripheral oedema, Joint pain, Palpitations, Shortness of breath, Headache, Myalgia, Cough, Back pain, Weight gain, Pain in throat, Abnormal gait, Respiratory distress, Weight loss*, Dizziness or vertigo, Chest pain, Sleep apnoea, Weakness, Wheezing. | 51 - 110 (a total of 60 days) | 51.6               | 61.90%     | NR          | NR      |
| 59. Wang, et al, USA, 2021 | To recognize the most common post-COVID condition to optimize care and                                                                                               | Cross sectional study | Survey                                    | January 2020–                       | 698         | Fatigue/Tired/ Weakness, Shortness of                                                                                                                                                                                                                                                                                                       | 30 days                       | 26.3% = ages 20-29 | 48.50%     | NR          | NR      |

| Author, Country, Year          | Aim(s) of the study                                                               | Study Design                      | Data Collection protocol/ collection tool | Timeline of Data collection    | Sample Size | Most common Symptoms                                                                                                                                                     | Days post infection | Average age          | % of Women | Average BMI | Smokers |
|--------------------------------|-----------------------------------------------------------------------------------|-----------------------------------|-------------------------------------------|--------------------------------|-------------|--------------------------------------------------------------------------------------------------------------------------------------------------------------------------|---------------------|----------------------|------------|-------------|---------|
|                                | identify benefits of COVID-19 vaccination                                         |                                   |                                           | April 2021                     |             | breath or breathlessness, Cough, Headache, Problems sleeping, Joint or muscle pain, Cognitive dysfunction, Chest pain or pressure, Post exertional malaise, Palpitations |                     |                      |            |             |         |
| 60. Yomogida, et al, USA, 2021 | To identify of groups disproportionately affected by post-acute COVID-19 sequelae | A prospective observational study | EHDB, interviews, questionnaire           | October 1, 2020– March 3, 2021 | 128         | Fatigue, Dyspnoea, Cough, Headache, myalgia, or arthralgia                                                                                                               | 60 days             | 39% aged 25–39 years | 56.60%     | NR          | NR      |

### Supplementary Table 2: Percentages of Symptoms

[illegible]



|                                            |                |         |      |                                   |           |       |           |          |            |         |                       |                            |
|--------------------------------------------|----------------|---------|------|-----------------------------------|-----------|-------|-----------|----------|------------|---------|-----------------------|----------------------------|
| Holmes et al.,<br>Australia, 2021          | 53             | 76.6    | 53.6 | ND                                | 21.4      | 64.3  | ND        | ND       | ND         | ND      | ND                    | ND                         |
| Hossain et al.,<br>Bangladesh,<br>2021     | 54             | 82.9    | 0    | ND                                | 3         | 8.7   | ND        | ND       | ND         | ND      | ND                    | ND                         |
| Jacobson et<br>al., USA, 2021              | 55             | 29.5    | 0    | 21.1                              | 14.7      | 8.7   | ND        | ND       | ND         | ND      | ND                    | ND                         |
| Kamal et al.,<br>Egypt, 2021               | 56             | 72.8    | 34.1 | 28.2                              | 28.9      | ND    | ND        | ND       | ND         | 38      | ND                    | ND                         |
|                                            | Article<br>No. | Fatigue | Pain | SOB/<br>breathing<br>disturbances | Headaches | Cough | Dizziness | Weakness | Palpations | Anxiety | Sleep<br>disturbances | Orthostatic<br>intolerance |
| Kayaaslan et<br>al., Turkey,<br>2021       | 58             | 29.3    | 0    | 20.5                              | 20.5      | 4.5   | ND        | ND       | ND         | ND      | ND                    | ND                         |
| Lund et al.,<br>Denmark,<br>2021           | 59             | ND      | 0    | 35.3                              | ND        | ND    | ND        | ND       | ND         | ND      | ND                    | ND                         |
| Mady et al.,<br>Egypt, 2021                | 60             | 16.8    | 10.5 | 6.3                               | ND        | 9.1   | ND        | ND       | ND         | 21.7    | ND                    | ND                         |
| Mahmoud et<br>al., Saudi<br>Arabia, 2021   | 61             | 72      | 48   | 85                                | ND        | ND    | ND        | ND       | ND         | ND      | ND                    | ND                         |
| Matta et al.,<br>France, 2021              | 62             | 2.5     | 16.5 | 0.8                               | 0.6       | 0.6   | 0.6       | ND       | ND         | ND      | 10.4                  | ND                         |
| Mittal et al.,<br>India, 2021              | 63             |         | 26   | 17                                | 1         |       | 19        | ND       | 14         | ND      | ND                    | ND                         |
| Mohamed-<br>Hussein et al.,<br>Egypt, 2021 | 64             | 64.1    | 0    | 52.7                              | ND        | ND    | ND        | ND       | ND         | ND      | ND                    | ND                         |

|                                       |             |         |      |                             |           |       |           |          |            |         |                    |                         |
|---------------------------------------|-------------|---------|------|-----------------------------|-----------|-------|-----------|----------|------------|---------|--------------------|-------------------------|
| Munker et al., Germany, 2021          | 65          |         | 0    | 65.7                        | ND        | ND    | ND        | ND       | ND         | ND      | ND                 | ND                      |
| Naik et al., India, 2021              | 66          | 3.3     | 12.2 | 3.4                         | ND        | 1.7   | ND        | ND       | ND         | ND      | ND                 | ND                      |
| Nehme et al., Switzerland, 2021       | 67          | 20.1    | 6.3  | 16.8                        | 3.1       | 3.7   | ND        | ND       | ND         | ND      | ND                 | ND                      |
| Ordinola Navarro et al., Mexico, 2021 | 68          | 25      | 0    | 15                          | 19        | 10    | ND        | ND       | ND         | ND      | ND                 | ND                      |
| Orrù et al., Italy, 2021              | 69          | 74      | 61   | ND                          | ND        | ND    | ND        | ND       | ND         | ND      | ND                 | ND                      |
|                                       | Article No. | Fatigue | Pain | SOB/ breathing disturbances | Headaches | Cough | Dizziness | Weakness | Palpations | Anxiety | Sleep disturbances | Orthostatic intolerance |
| Peghin et al., Italy, 2021            | 70          | 11      | 8    | 5.4                         | 0.7       | 1.7   | ND        | ND       | ND         | ND      | ND                 | ND                      |
| Petersen et al., Faroe Island, 2021   | 71          | 23.9    | 10   | 8                           | 5         | ND    | ND        | ND       | ND         | ND      | ND                 | ND                      |
| Sahanic et al., Italy, Austria, 2021  | 72          | 34      | 15.5 | 13                          | 13        | 3.7   | ND        | ND       | 33         | ND      | ND                 | ND                      |
| Shendy et al., Egypt, 2021            | 73          | 64.2    | 1.3  | 13                          | ND        | ND    | ND        | ND       | 26.5       | ND      | ND                 | ND                      |
| Shouman et al., Germany, 2021         | 74          |         | 22   | ND                          | ND        | ND    | 93        | ND       | 41         | ND      | ND                 | ND                      |

|                                             |                |         |      |                                   |           |       |           |          |            |         |                       |                            |
|---------------------------------------------|----------------|---------|------|-----------------------------------|-----------|-------|-----------|----------|------------|---------|-----------------------|----------------------------|
| Sivan et al.,<br>UK, 2021                   | 75             | 95      | 0    | 85                                | ND        | ND    | ND        | ND       | ND         | 90      | ND                    | ND                         |
| Skala et al.,<br>Czechia, 2021              | 76             | 22      | 3.9  | 23                                | 13        | 13    | ND        | ND       | ND         | ND      | ND                    | ND                         |
| Soraas et al.,<br>Norway, 2021              | 77             | 23      | 8    | 10                                | ND        | 8     | ND        | ND       | ND         | ND      | ND                    | ND                         |
| Sudre et al.,<br>UK, US and<br>Sweden, 2021 | 78             | 97.7    | 91.2 | 91.2                              | ND        | ND    | ND        | ND       | ND         | ND      | ND                    | ND                         |
| Sultana et al.,<br>Bangladesh               | 79             | 8.1     | 1.6  | 6.5                               | 0.5       | ND    | ND        | ND       | ND         | ND      | 3.8                   | ND                         |
| Tabacof et al.,<br>USA 2022                 | 80             | 82      | 27   | 55                                | 38        | ND    | ND        | ND       | 45         | ND      | ND                    | ND                         |
| Taquet et al.,<br>UK, 2021                  | 81             | 5.87    | 8.67 | 7.94                              | 5.71      | ND    | ND        | ND       | ND         | ND      | ND                    | ND                         |
| Townsend et<br>al., Ireland,<br>2020        | 82             | 11.38   | 0    | ND                                | ND        | ND    | ND        | ND       | ND         | 7.8     | ND                    | ND                         |
|                                             | Article<br>No. | Fatigue | Pain | SOB/<br>breathing<br>disturbances | Headaches | Cough | Dizziness | Weakness | Palpations | Anxiety | Sleep<br>disturbances | Orthostatic<br>intolerance |
| Tran et al.,<br>France, 2021                | 83             | 87.9    | 69.3 | 55.7                              | ND        | ND    | ND        | ND       | ND         | ND      | 59                    | ND                         |
| Vanichkachorn<br>et al., USA,<br>2021       | 84             | 80      | 20   | 49                                | ND        | 15    | 19        | ND       | ND         | ND      | ND                    | ND                         |
| Wang,et al.,<br>USA, 2021                   | 13             | 23.4    | 21   | 20.8                              | 12.5      | 17.5  | 14        | 12.3     | 10.3       | 25.8    | 11.2                  | ND                         |
| Wanga et al.,<br>USA, 2021                  | 86             | 24.7    | 7.3  | 15.5                              | 12        | 13.8  | ND        | ND       | ND         | ND      | ND                    | ND                         |

|                            |    |      |      |      |      |      |    |    |    |    |    |    |
|----------------------------|----|------|------|------|------|------|----|----|----|----|----|----|
| Yomogida et al., USA, 2021 | 87 | 24.7 | 16.9 | 17.8 | 15.3 | 13.9 | ND | ND | ND | ND | ND | ND |
|----------------------------|----|------|------|------|------|------|----|----|----|----|----|----|

Key: ND = Not discussed
